# Supplementary material for: Research on the Relationship between the Structure of Forest and Grass Ecological Spaces and Ecological Service Capacity: A Case Study of the Wuding River Basin
Source: MDPI journal article supplement (doi:10.3390/rs15092456), 2023-05-07
Supplement: s1 [file s1]

## Supplementary Materials for

# Research on the Relationship between the Structure of Forest and Grass Ecological Spaces and Ecological Service Capacity: A Case Study of the Wuding River Basin

Yufan Zeng, Qiang Yu \*, Xiaoci Wang, Jun Ma, Chenglong Xu, Shi Qiu, Wei Liu and Fei Wang

College of Forestry, Beijing Forestry University, Beijing 100083, China;  
zengyufan59@bjfu.edu.cn (Y.Z.); wangxiaoci2118@bjfu.edu.cn (X.W.);  
majun\_oitkg@bjfu.edu.cn (J.M.); xuchenglong@bjfu.edu.cn (C.X.);  
charles23@bjfu.edu.cn (S.Q.); vivian\_liu@bjfu.edu.cn (W.L.); wangfei@bjfu.edu.cn (F.W.)

\* Correspondence: yuqiang@bjfu.edu.cn; Tel.: +86-13021239234

**This files includes:**

**1) Figure S1**

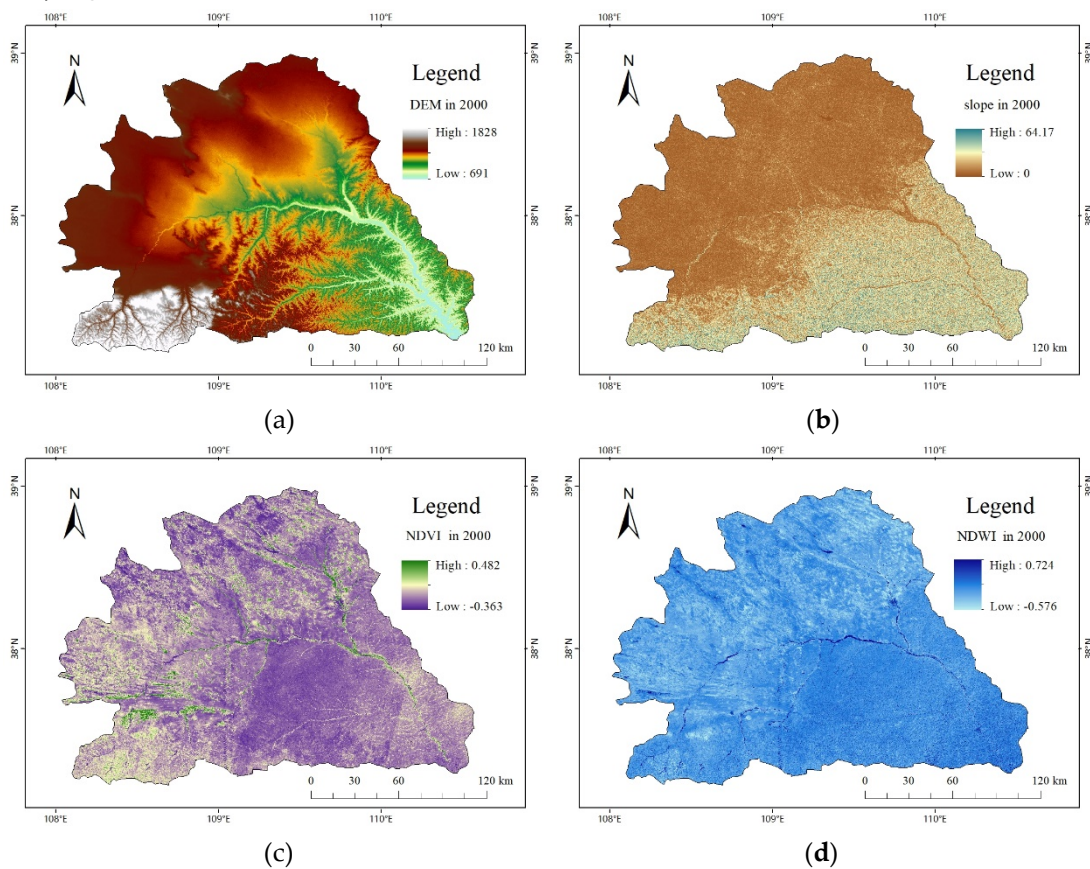

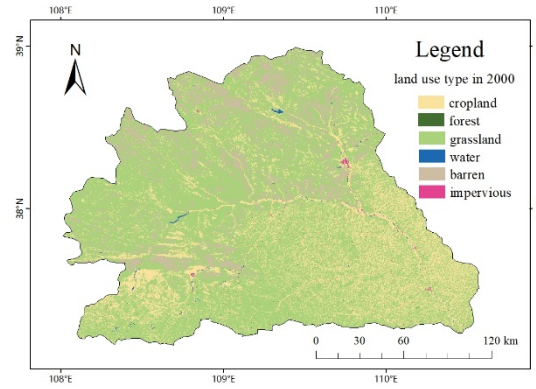

(e)

**Figure S1.** Ecological resistance factors of the study area in the year 2000. (a) DEM in 2000, (b) Slope in 2000, (c) NDVI in 2000, (d) NDWI in 2000, (e) Land use type in 2000.

## 2) Figure S2

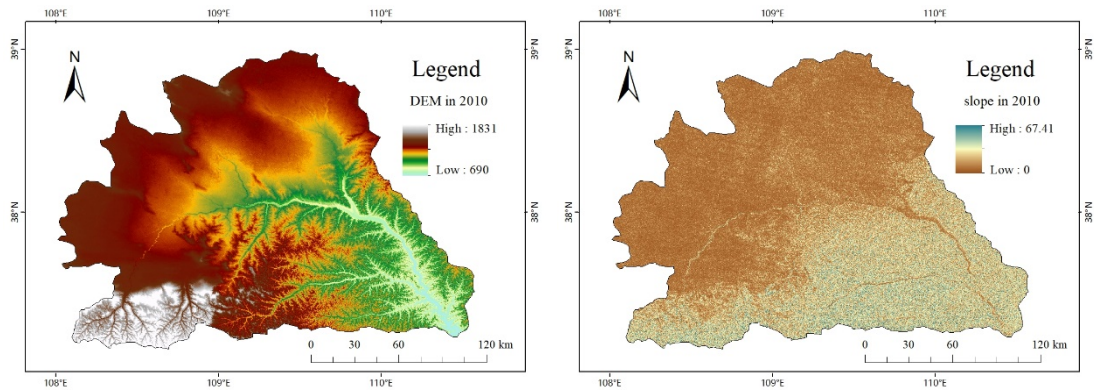

(a)

(b)

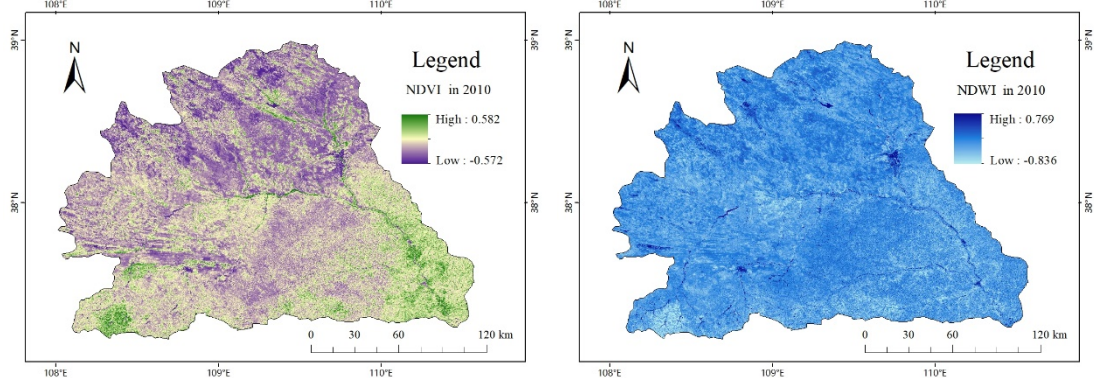

(c)

(d)

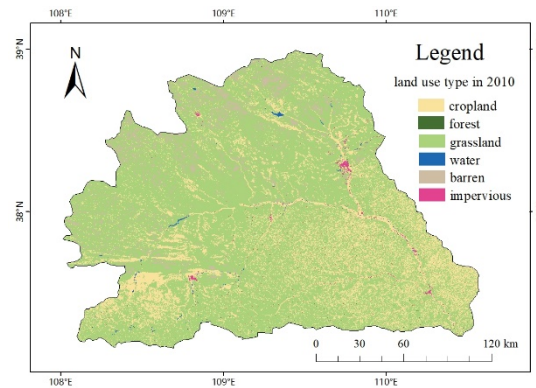

(e)

**Figure S2.** Ecological resistance factors of the study area in the year 2010. (a)DEM in 2010, (b) Slope in 2010, (c) NDVI in 2010, (d) NDWI in 2010, (e) Land use type in 2010.

### 3) Figure S3

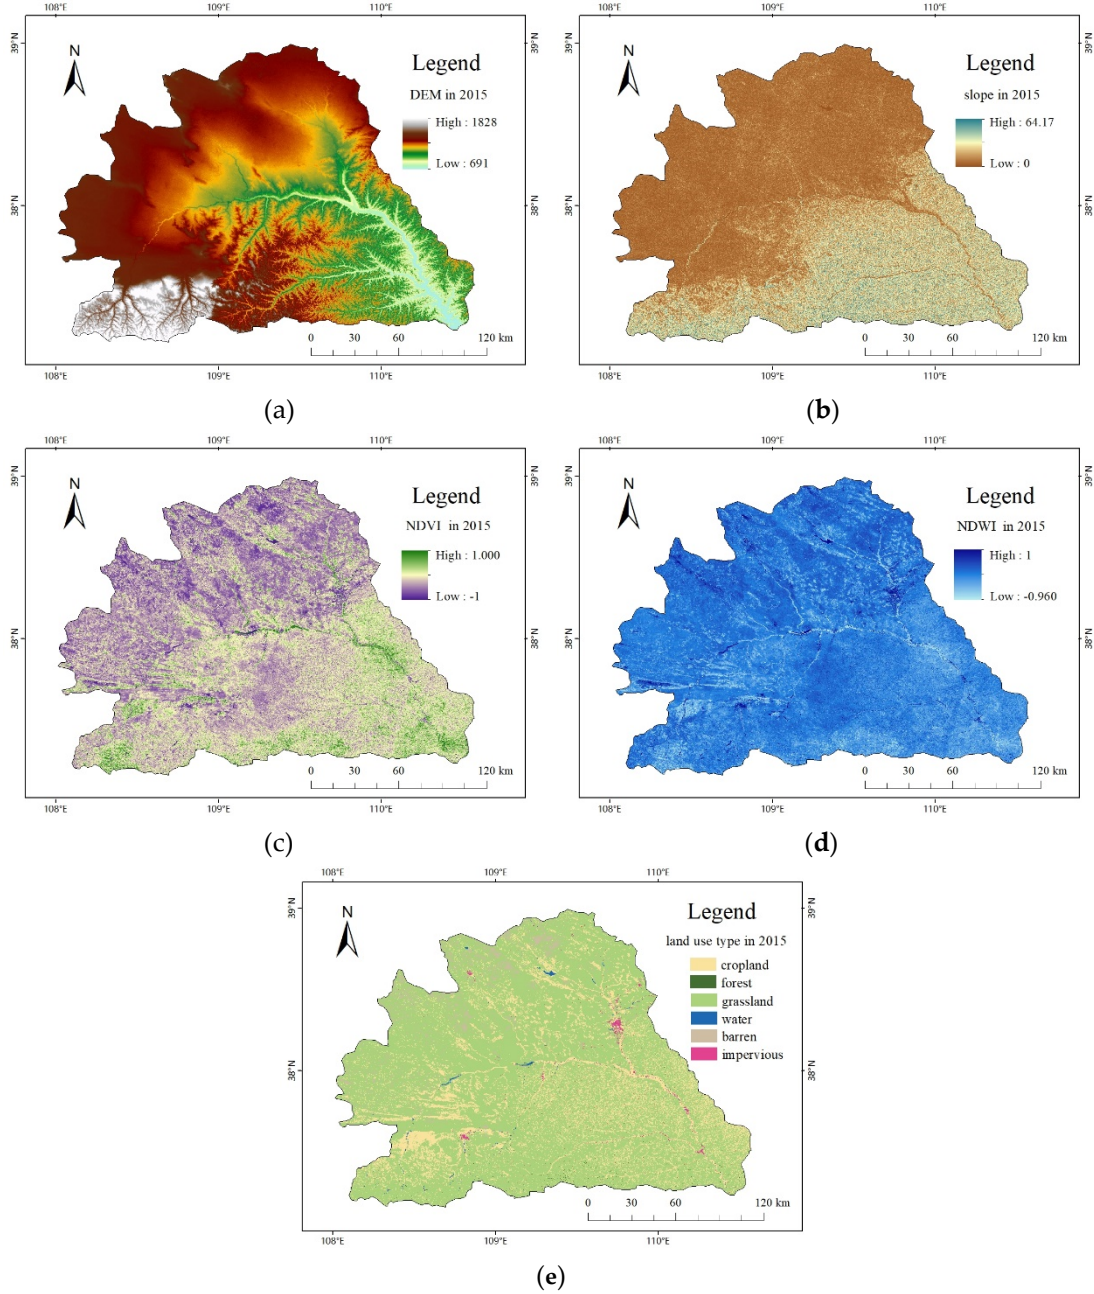

(e)

**Figure S3.** Ecological resistance factors of the study area in the year 2015. (a)DEM in 2015, (b) Slope in 2015, (c) NDVI in 2015, (d) NDWI in 2015, (e) Land use type in 2015.

### 4) Figure S4



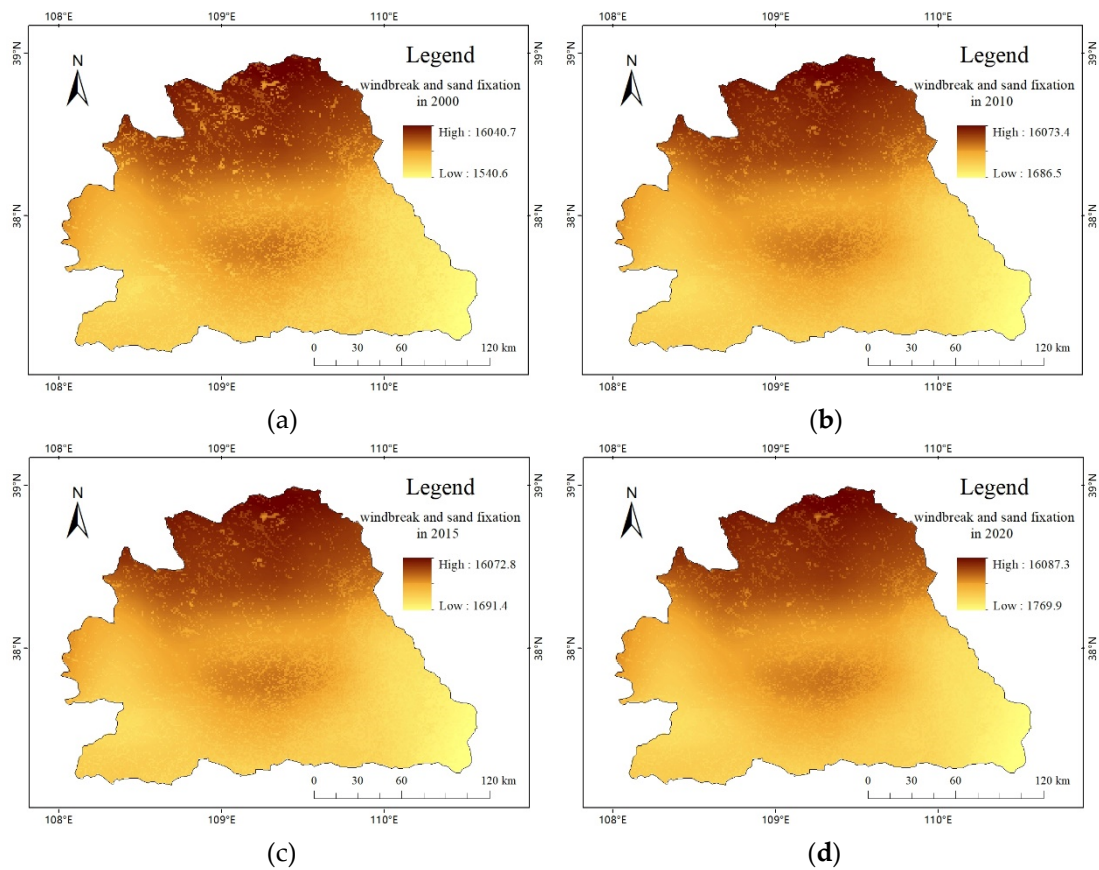

**Figure S4.** Windbreak and Sand Fixation in the Study Area from 2000 to 2020. (a) Windbreak and Sand Fixation in 2000, (b) Windbreak and Sand Fixation in 2010, (c) Windbreak and Sand Fixation in 2015, (d) Windbreak and Sand Fixation in 2020.

## 5) Figure S5

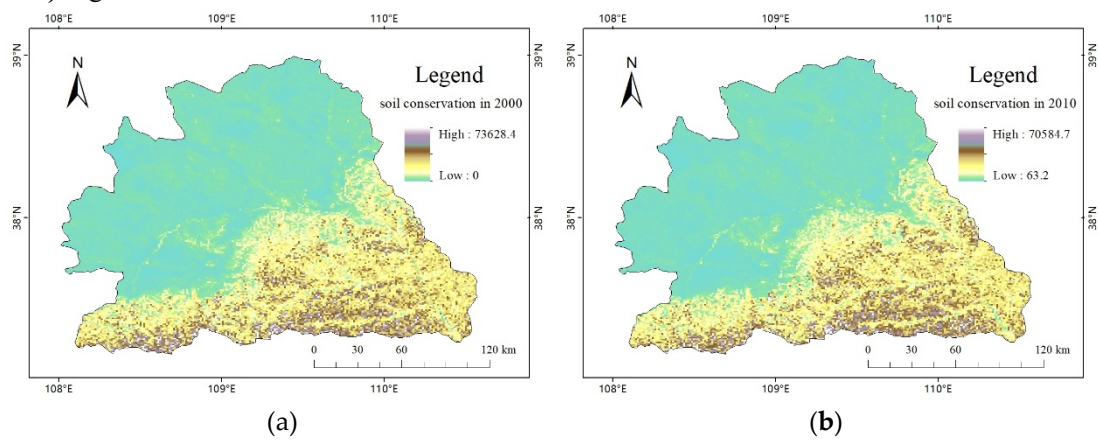



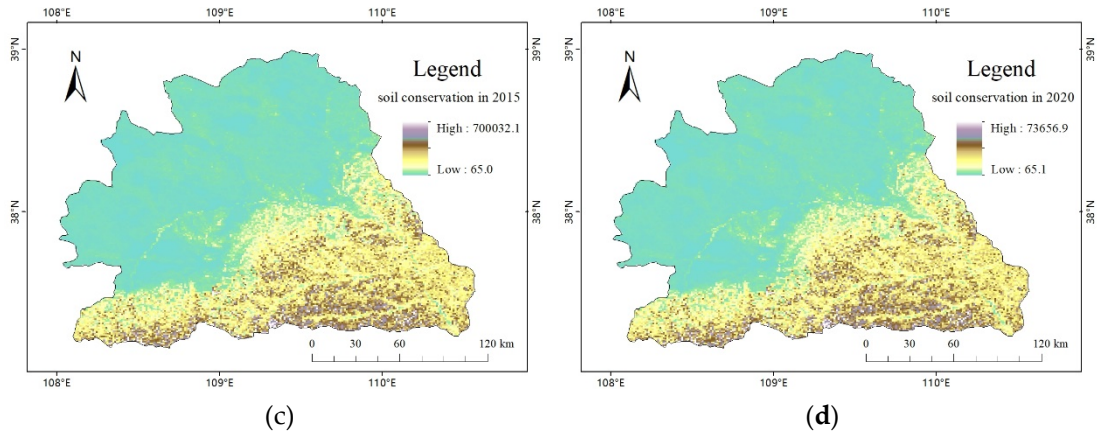

**Figure S5.** Soil Conservation Amount of the Study Area from 2000 to 2020. (a) Soil Conservation Amount in 2000, (b) Soil Conservation Amount in 2010, (c) Soil Conservation Amount in 2015, (d) Soil Conservation Amount in 2020.

## 6) Figure S6

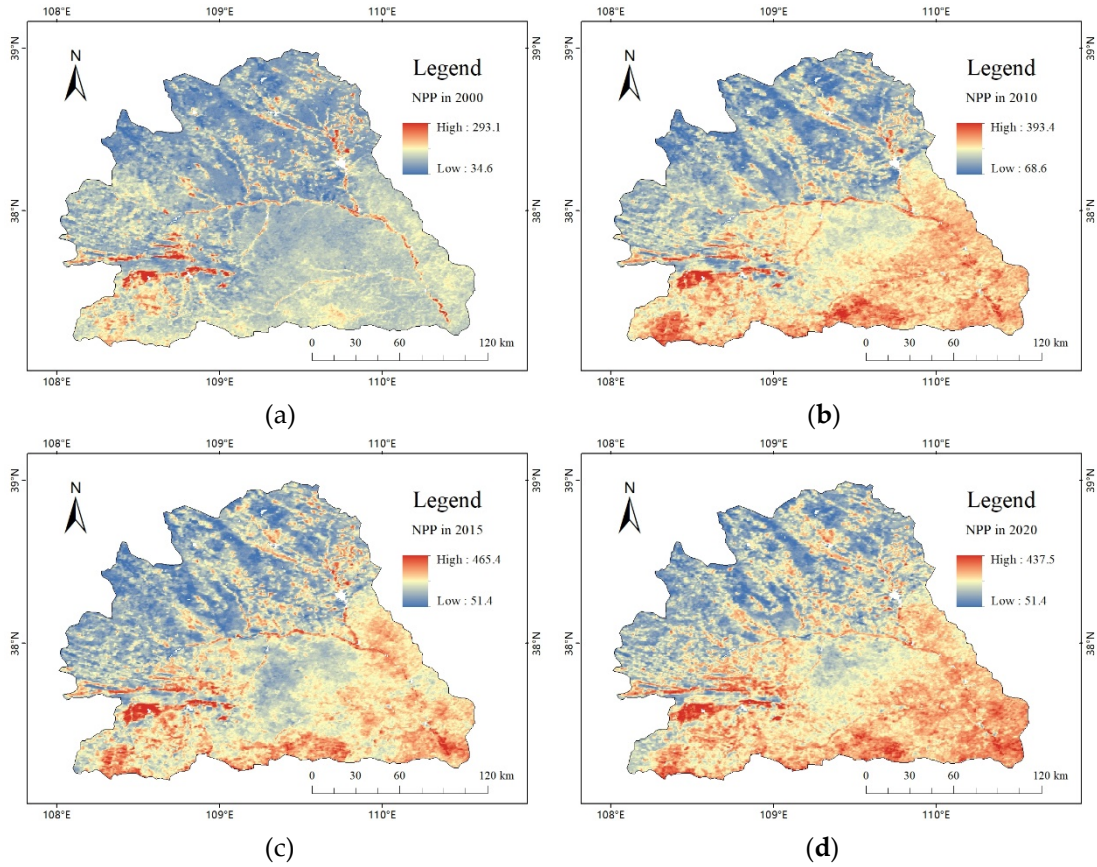

**Figure S6.** NPP of the Study Area from 2000 to 2020. (a) NPP in 2000, (b) NPP in 2010, (c) NPP in 2015, (d) NPP in 2020.
